# Supplementary material for: Inhibition of β1-AR/Gαs signaling promotes cardiomyocyte proliferation in juvenile mice through activation of RhoA-YAP axis
Source: eLife journal article supplement (doi:10.7554/elife.74576), 2022-12-08
Supplement: supp [file elife-74576-supp-v1.zip]

Archive with 12 entries (12 files):
- elife_poa_e74576_Figure_1_figure_supplement_1.pdf
- elife_poa_e74576_Figure_2_figure_supplement_1.pdf
- elife_poa_e74576_Figure_2_figure_supplement_2.pdf
- elife_poa_e74576_Figure_3_figure_supplement_1.pdf
- elife_poa_e74576_Figure_4_figure_supplement_1.pdf
- elife_poa_e74576_Figure_4_figure_supplement_2.pdf
- elife_poa_e74576_Figure_5_figure_supplement_1.pdf
- elife_poa_e74576_Figure_5_figure_supplement_2.pdf
- elife_poa_e74576_Figure_4_figure_supplement_2_source_data_1.zip
- elife_poa_e74576_Figure_5_source_data_1.zip
- elife_poa_e74576_Figure_5_figure_supplement_1_source_data_1.zip
- elife_poa_e74576_Transparent_Reporting_File.docx
