# Supplementary material for: Inhibition of β1-AR/Gαs signaling promotes cardiomyocyte proliferation in juvenile mice through activation of RhoA-YAP axis
Source: eLife journal article supplement (doi:10.7554/elife.74576), 2022-12-08

Figure5b-source data1

Active RhoA

P7 Heart

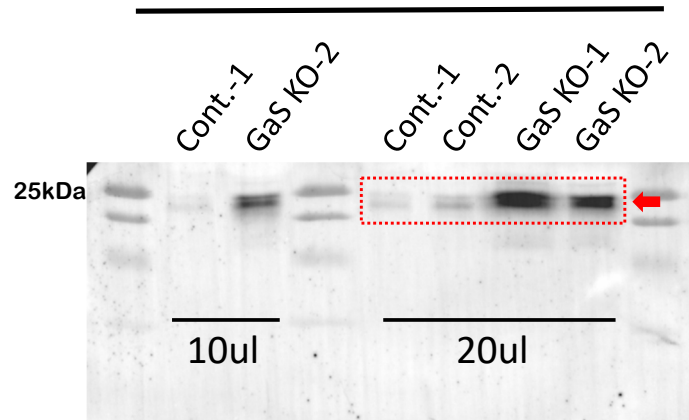

IB: RhoA

RhoA Ab.: CST Rabbit RhoA (2117S)

Figure5b-source data2

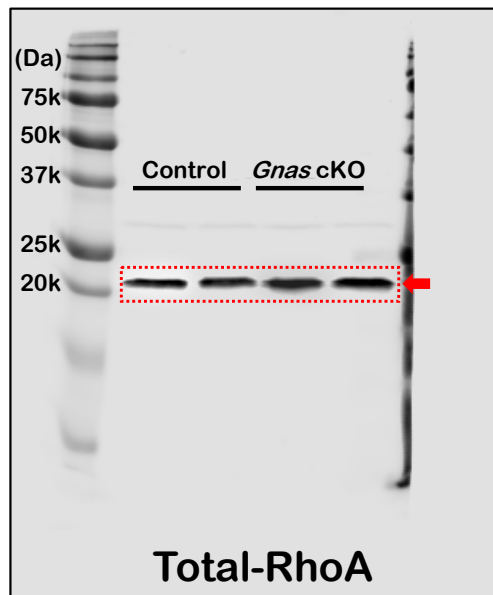

Figure5b-source data3

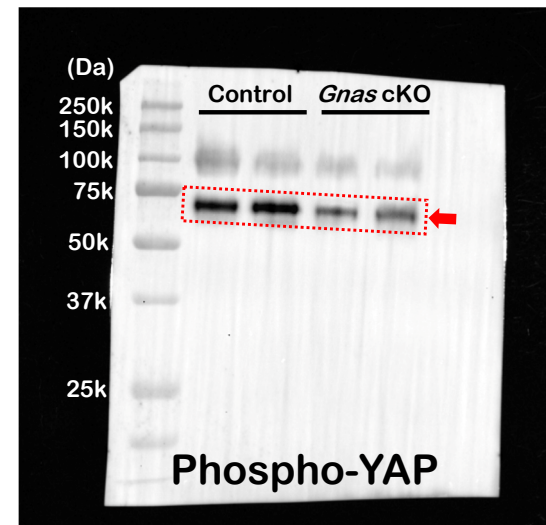

Figure5b-source data4

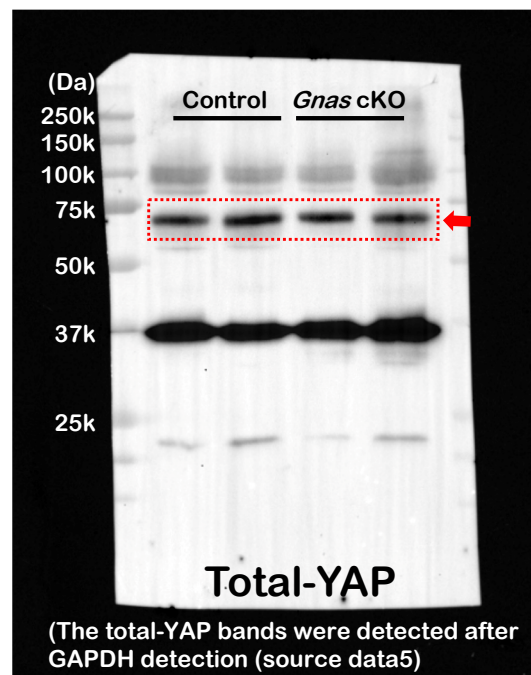

Figure5b-source data5

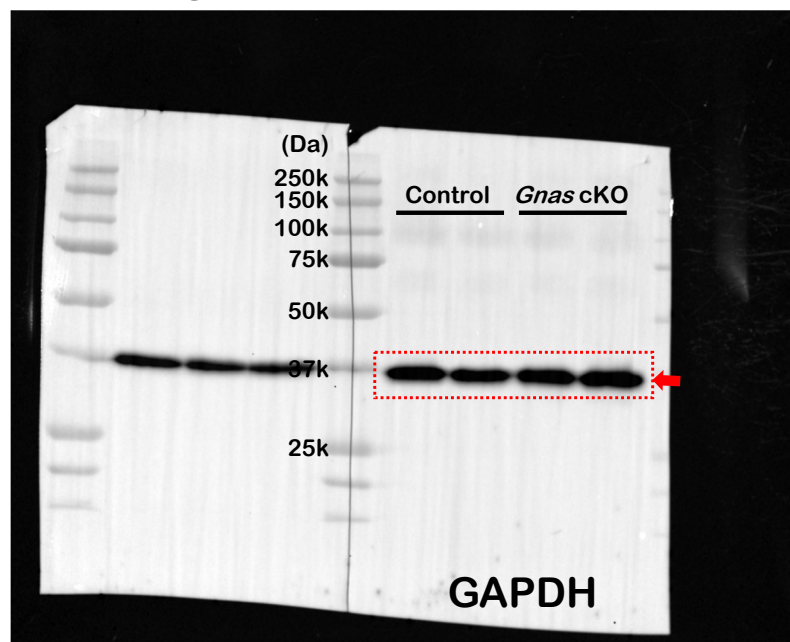

Figure5c-source data6

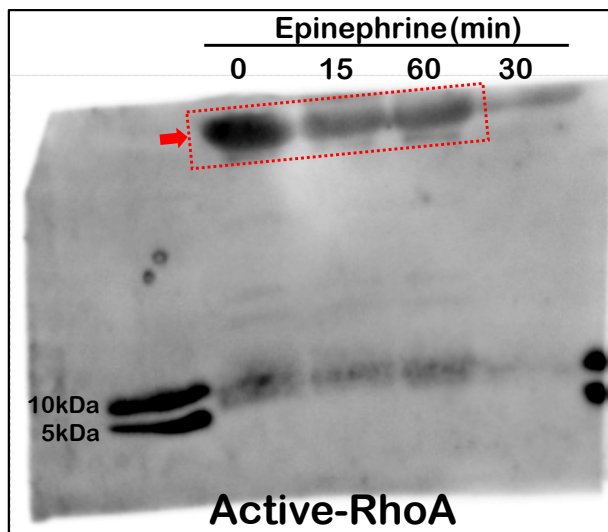

Figure5c-source data7

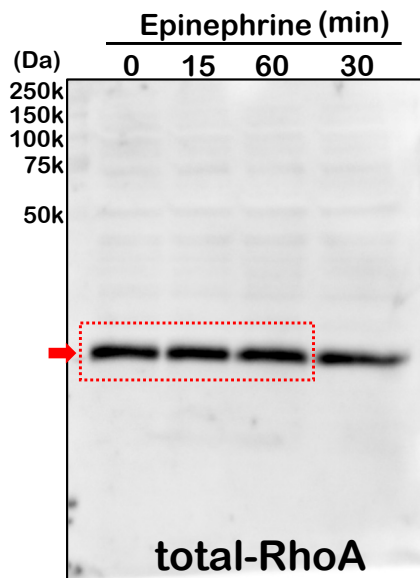

Figure5c-source data8

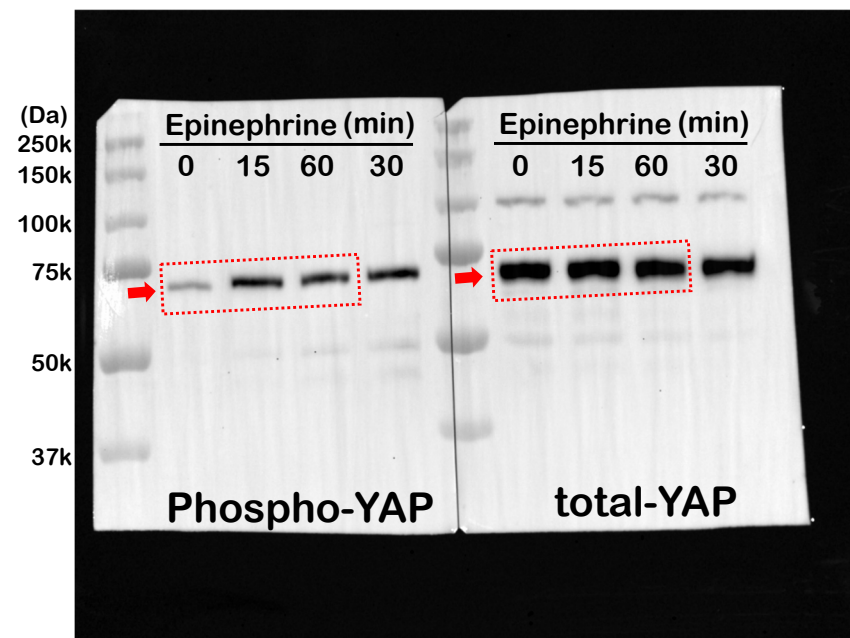

Figure5c-source data9

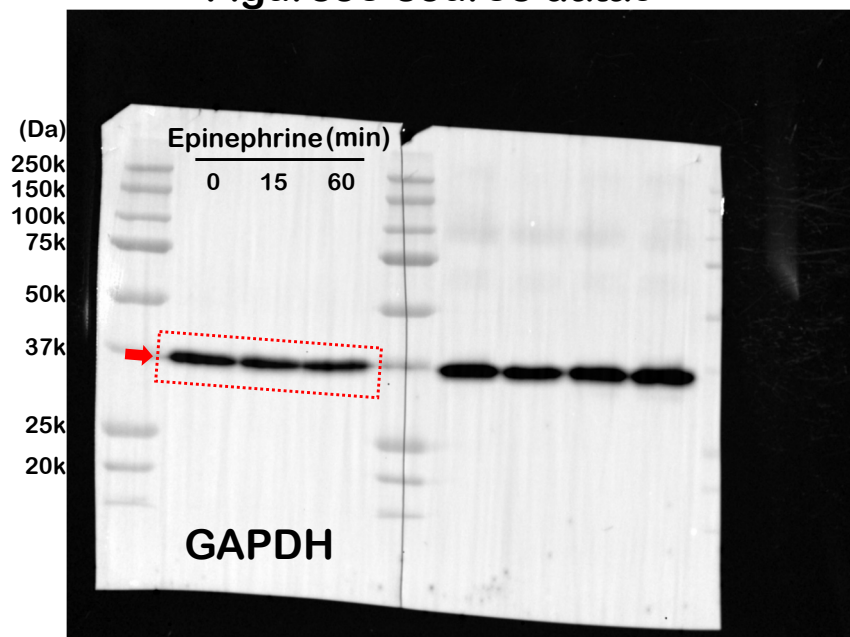

Supplement: supp [file Figure5 source data.pdf › Source data Figure5/Figure5 source data.pdf]
