# Supplementary material for: Inhibition of β1-AR/Gαs signaling promotes cardiomyocyte proliferation in juvenile mice through activation of RhoA-YAP axis
Source: eLife journal article supplement (doi:10.7554/elife.74576), 2022-12-08
Supplement: supp [file Figure5-figure supplement1 source data.pdf › Source data Figure5-figure supplement1/Figure5-figure supplement1 source data.pdf]

Figure5-figure supplement1-source data1

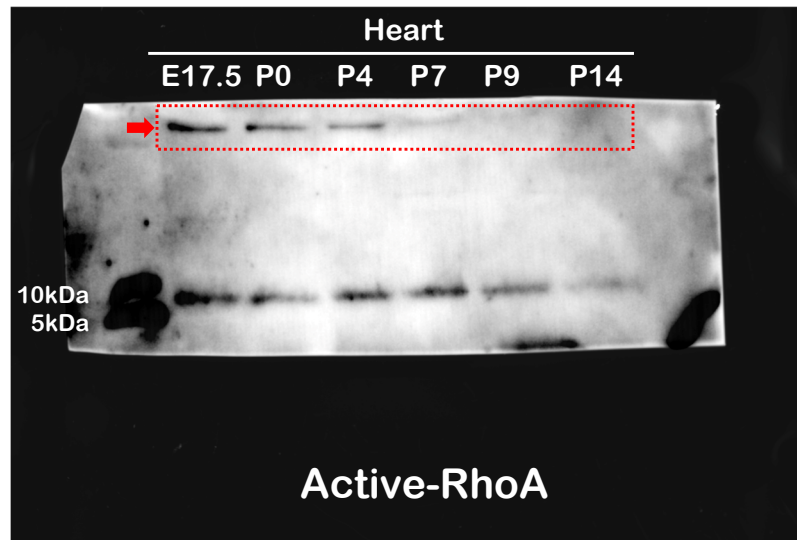

Figure5-figure supplement1-source data2

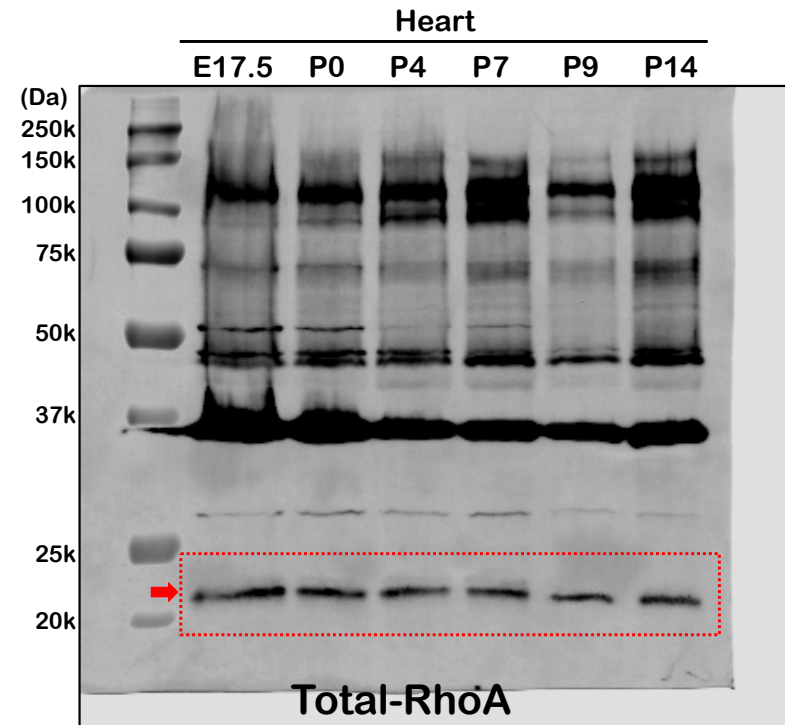

Since we reused the membrane several times, we saw extra bands that caused by previous antibodies. The total-RhoA antibody just detect RhoA, as shown in Figure5b source data2.
