# Supplementary figures and images for: Inhibition of β1-AR/Gαs signaling promotes cardiomyocyte proliferation in juvenile mice through activation of RhoA-YAP axis
Source: eLife journal article supplement (doi:10.7554/elife.74576), 2022-12-08

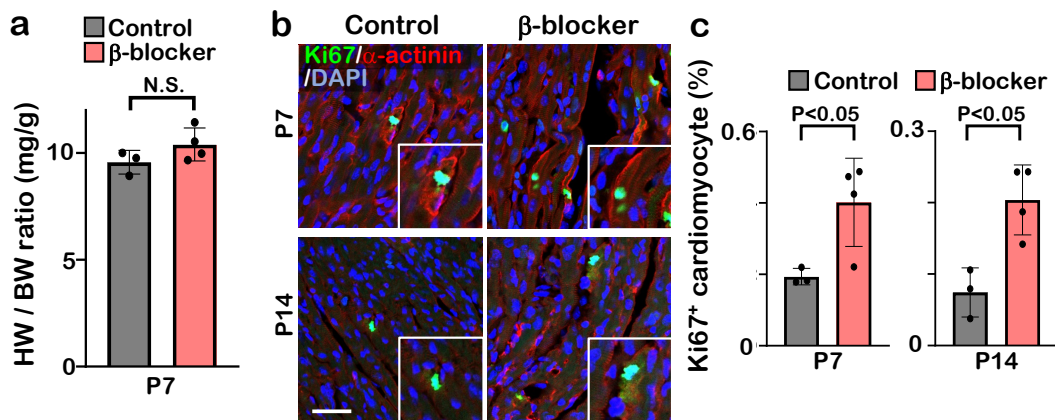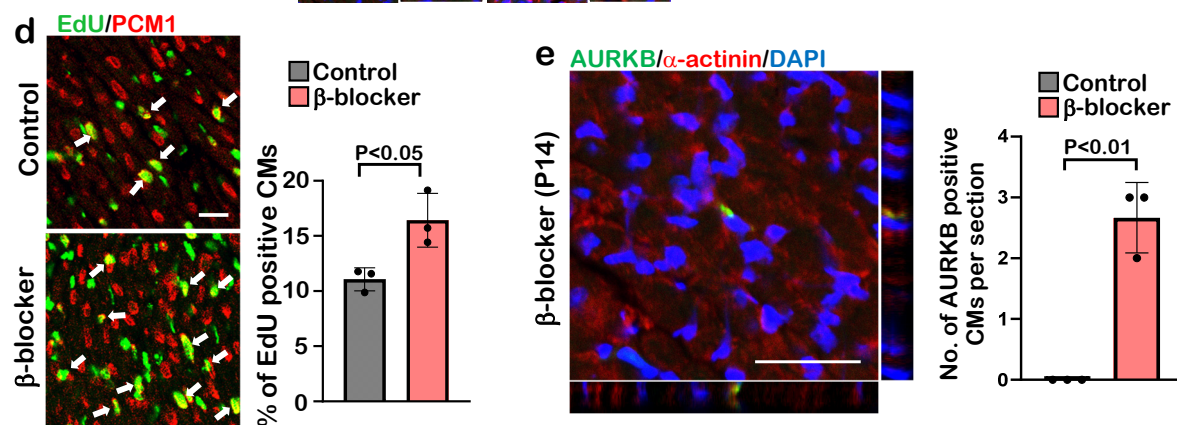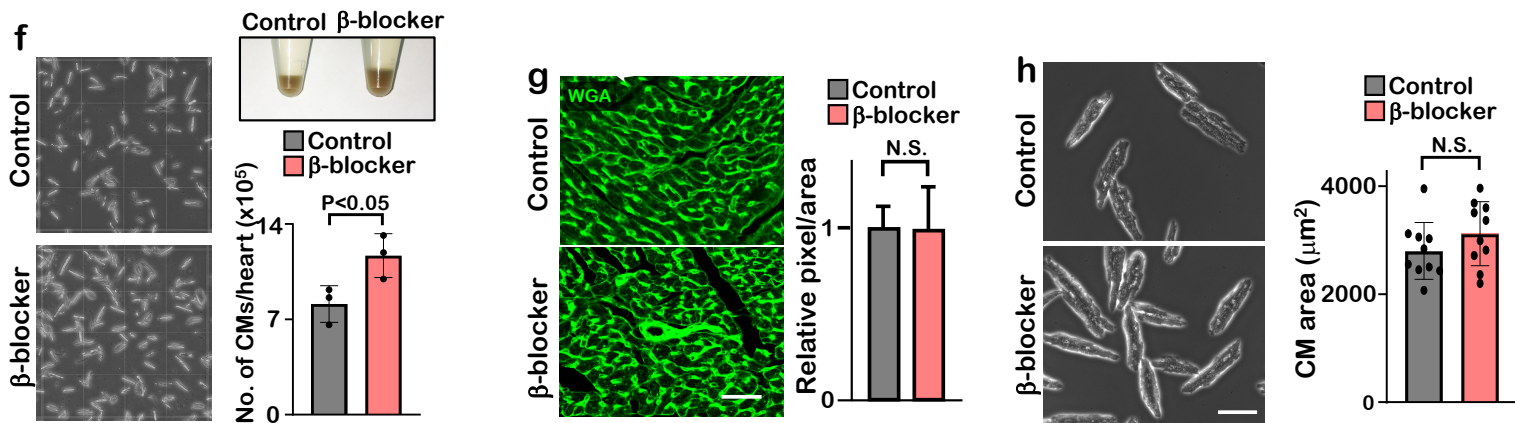

Supplement: supp [file elife-74576-supp-v1.zip › elife_poa_e74576_Figure_1_figure_supplement_1.pdf]

MI: P7  
Harvest: P8

TTC

Control

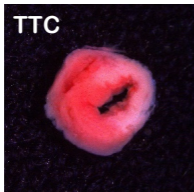

$\beta$ -blocker

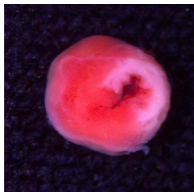

Control  
 $\beta$ -blocker

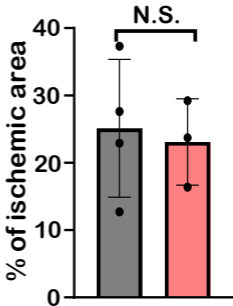

Supplement: supp [file elife-74576-supp-v1.zip › elife_poa_e74576_Figure_2_figure_supplement_1.pdf]

## P28 (3 weeks post-MI)

Base

Control

$\beta$ -blocker

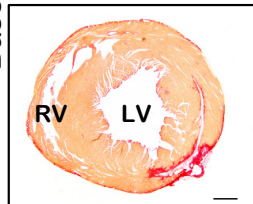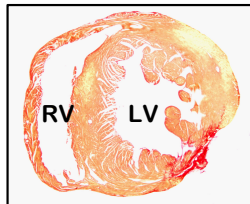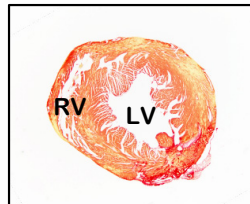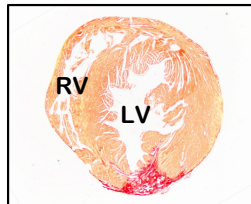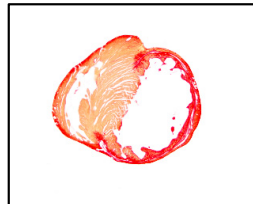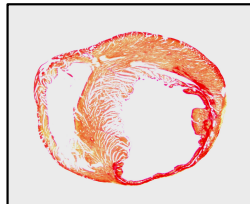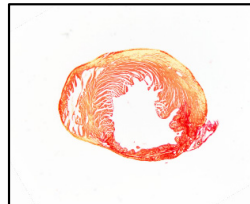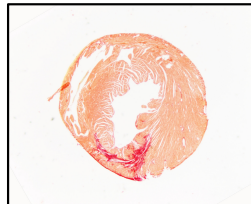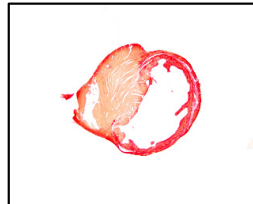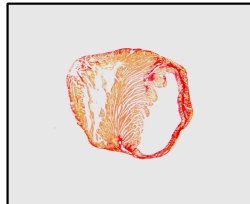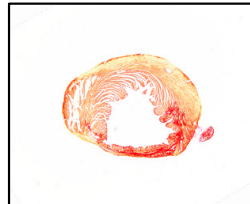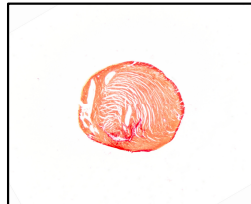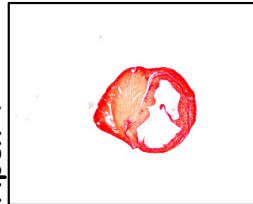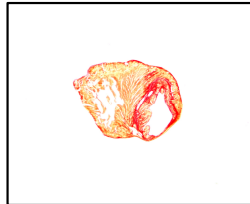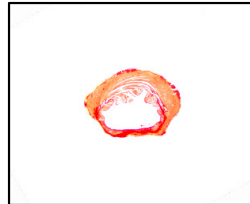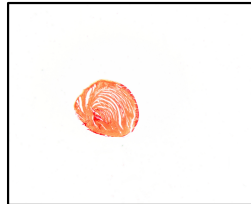

Apex

Supplement: supp [file elife-74576-supp-v1.zip › elife_poa_e74576_Figure_2_figure_supplement_2.pdf]

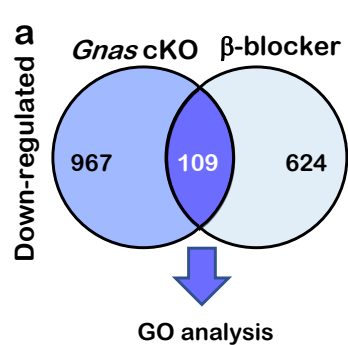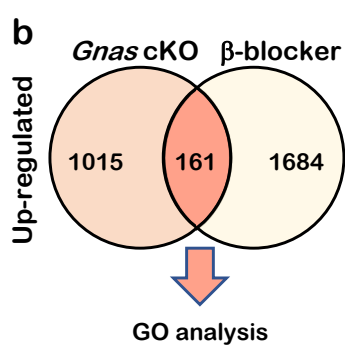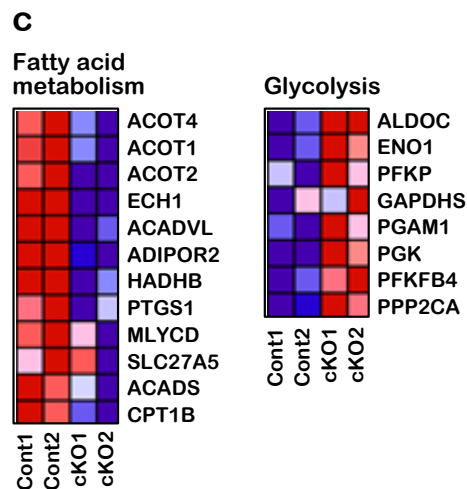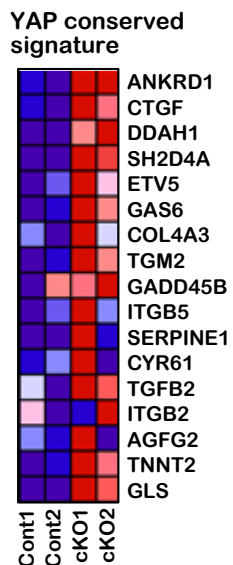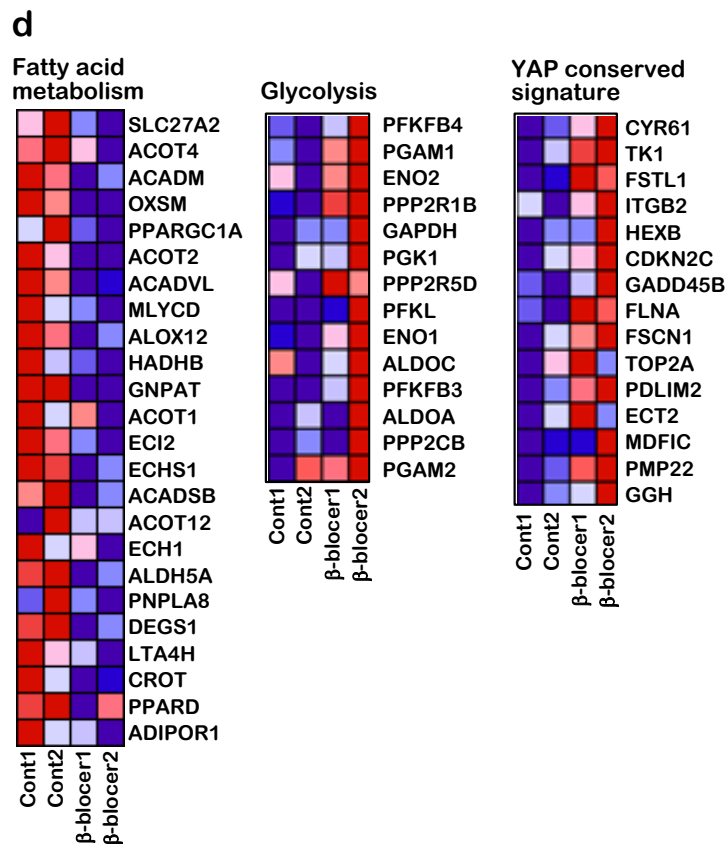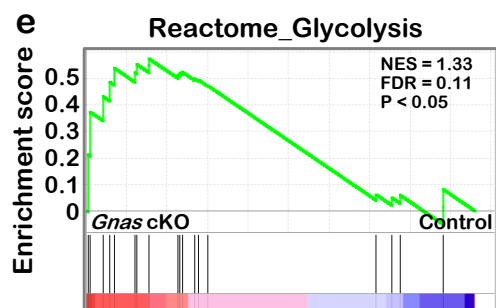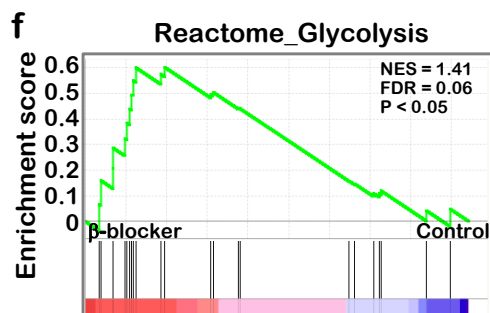

Supplement: supp [file elife-74576-supp-v1.zip › elife_poa_e74576_Figure_4_figure_supplement_1.pdf]

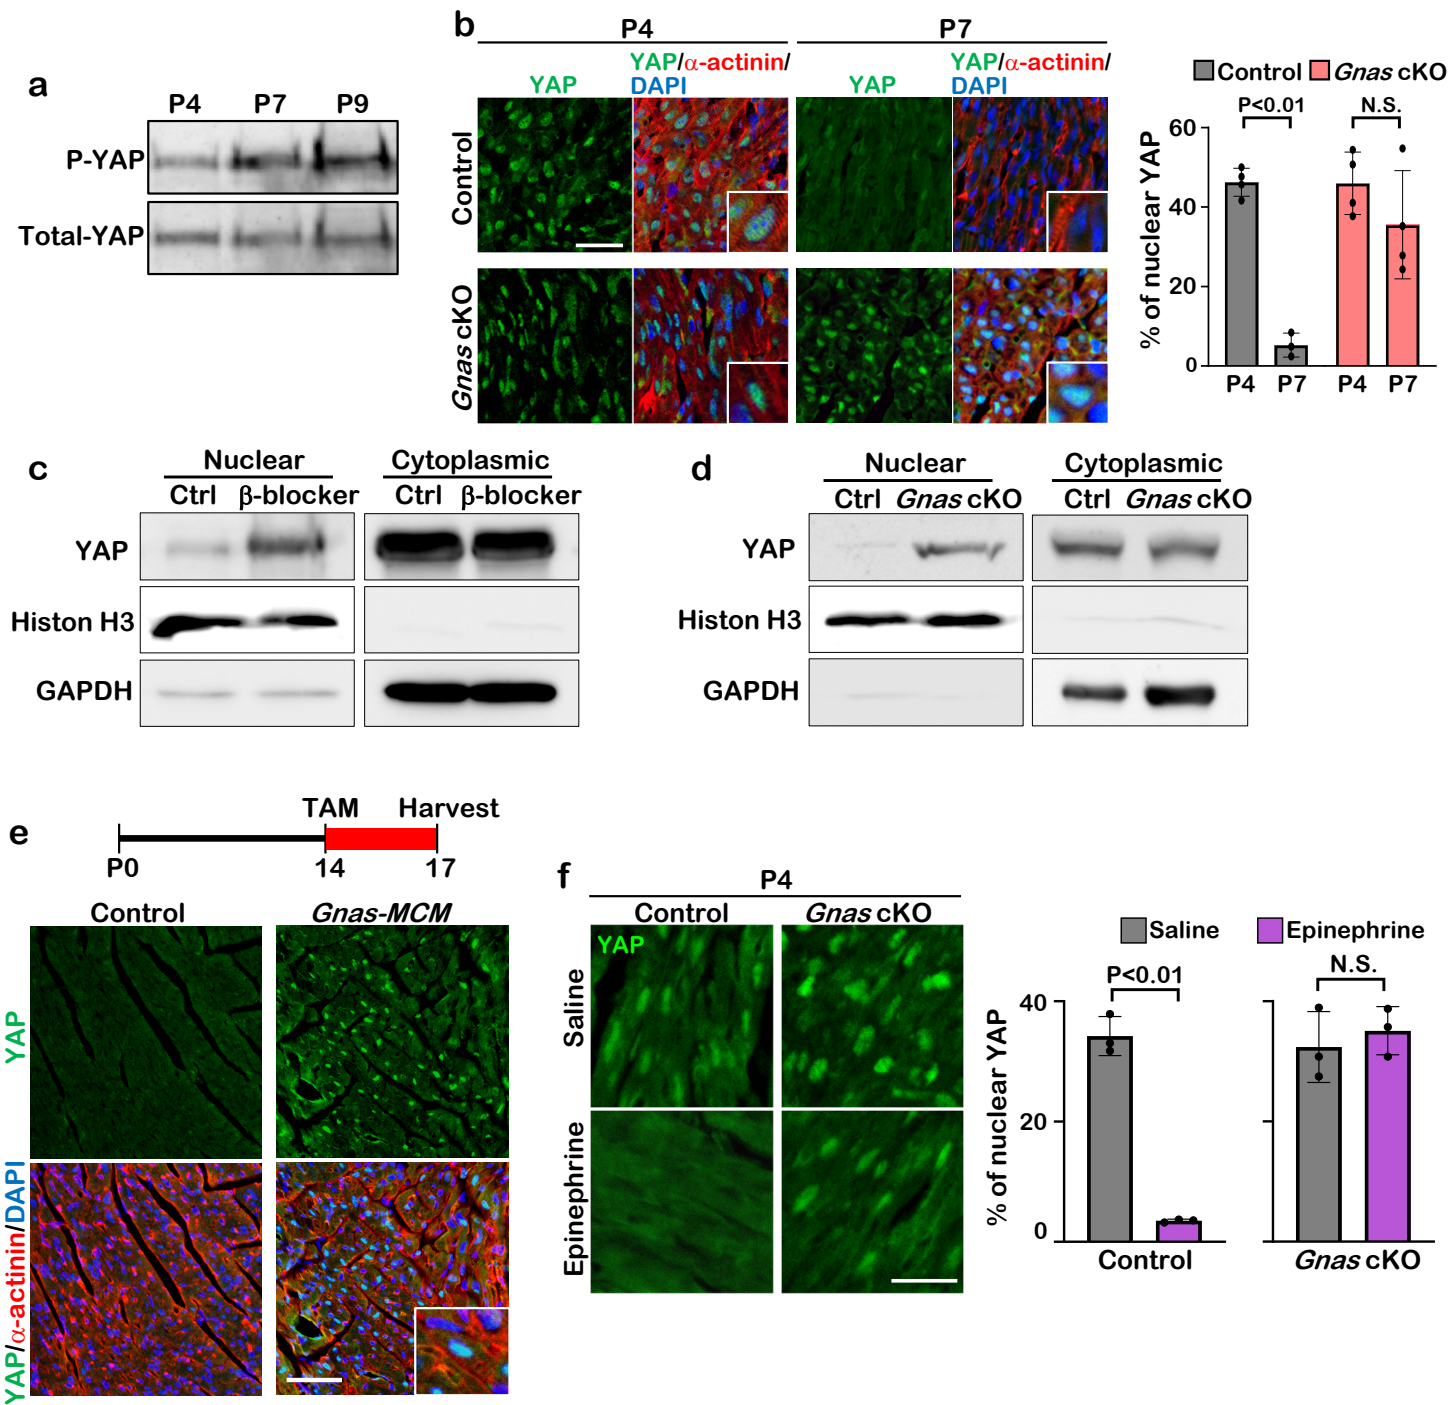

Supplement: supp [file elife-74576-supp-v1.zip › elife_poa_e74576_Figure_4_figure_supplement_2.pdf]

## Heart

E17.5

P0

P4

P7

P9

P14

Active  
RhoA

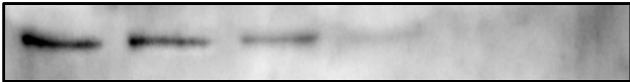

Total  
RhoA

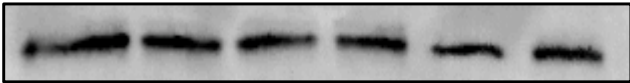

Supplement: supp [file elife-74576-supp-v1.zip › elife_poa_e74576_Figure_5_figure_supplement_1.pdf]

Heart rate (beats/min)

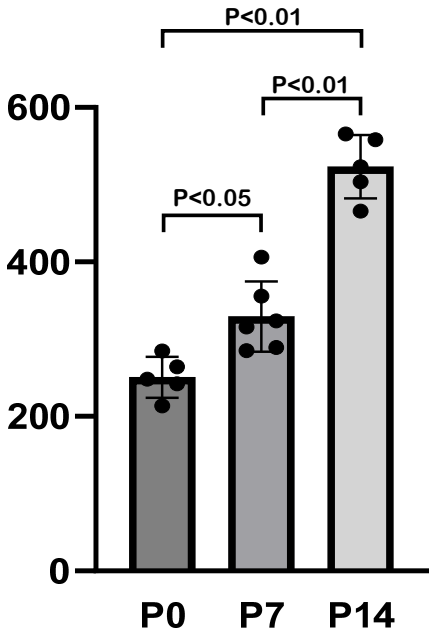

Supplement: supp [file elife-74576-supp-v1.zip › elife_poa_e74576_Figure_5_figure_supplement_2.pdf]

Figure4 figure supplement-2-source data

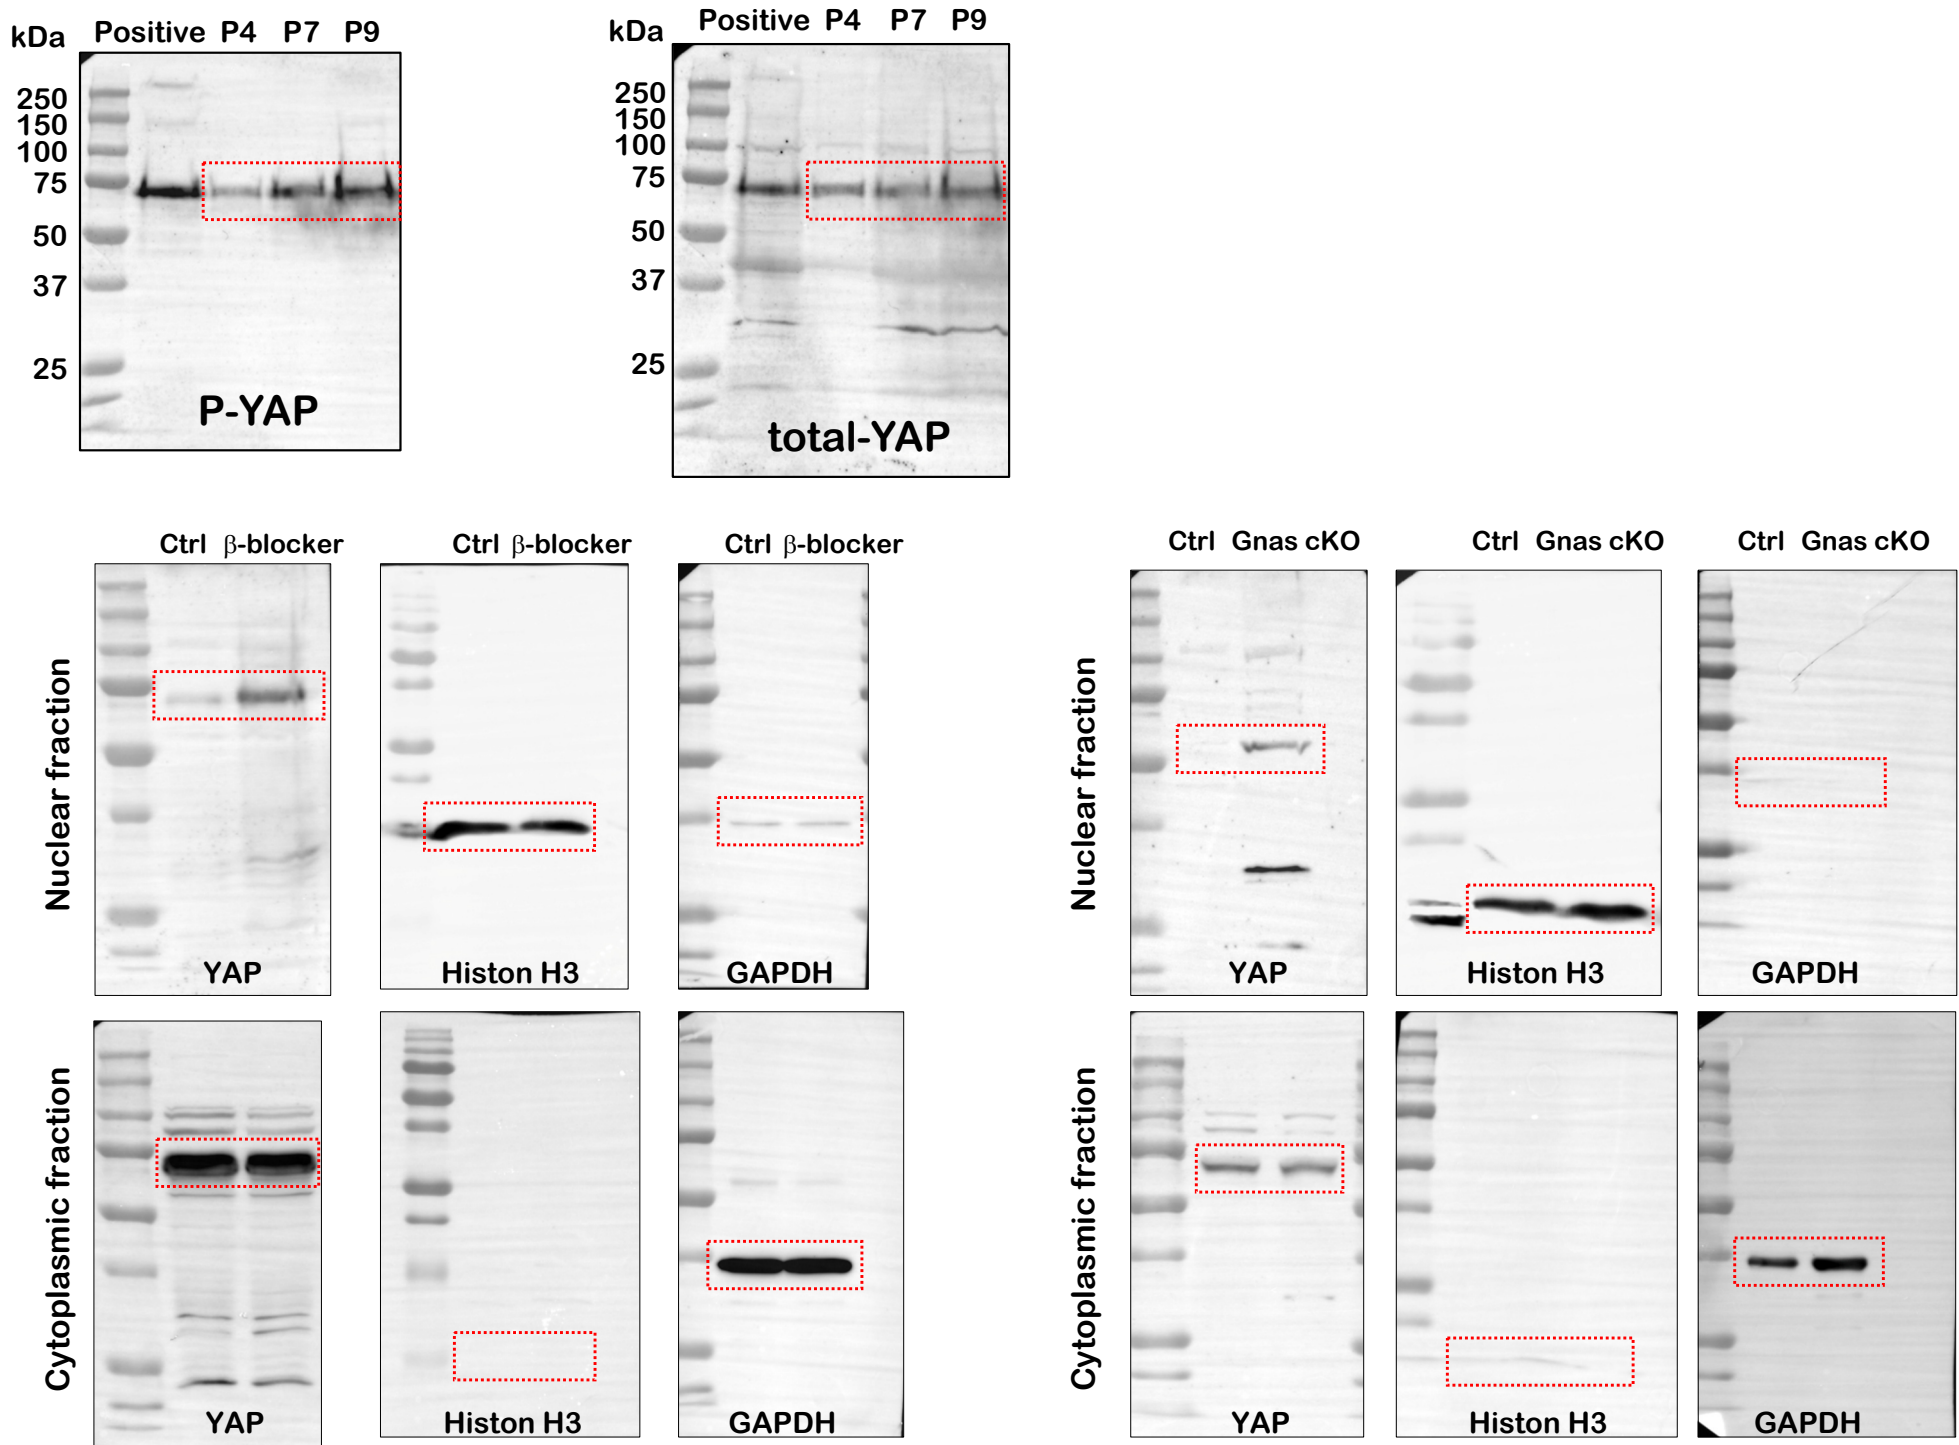

Supplement: supp [file Figure4-figure supplement-2-source data.pdf › Source data Figure4-figure supplement2/Figure4-figure supplement-2-source data.pdf]

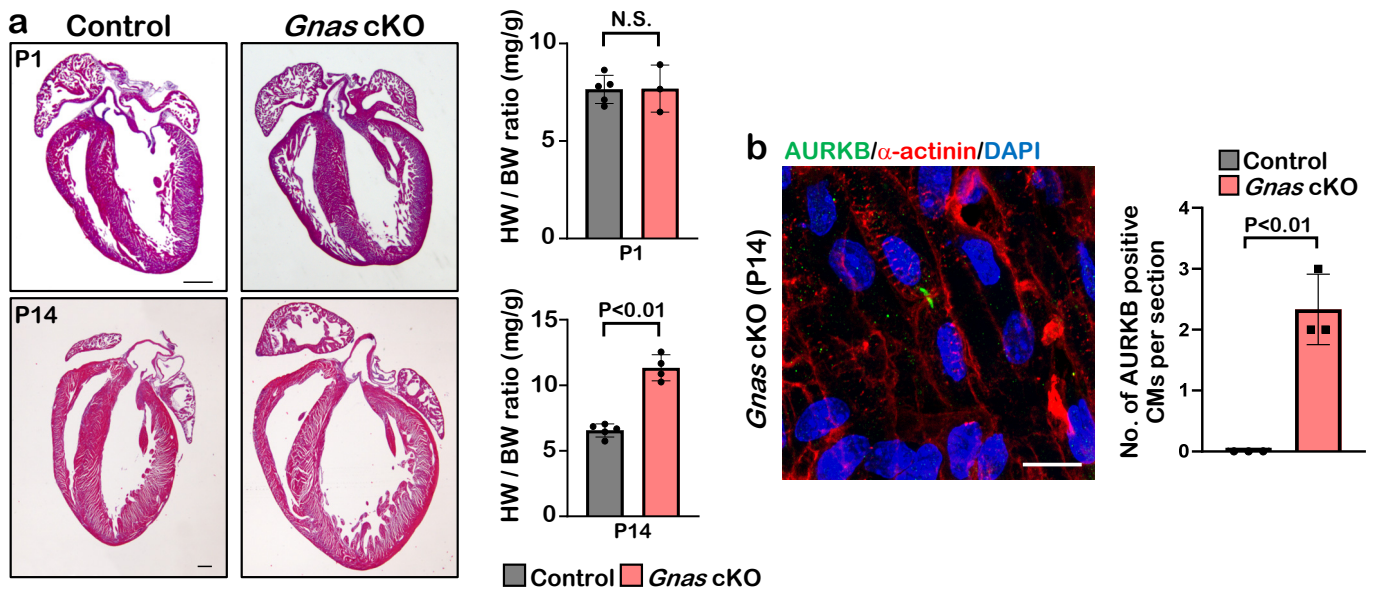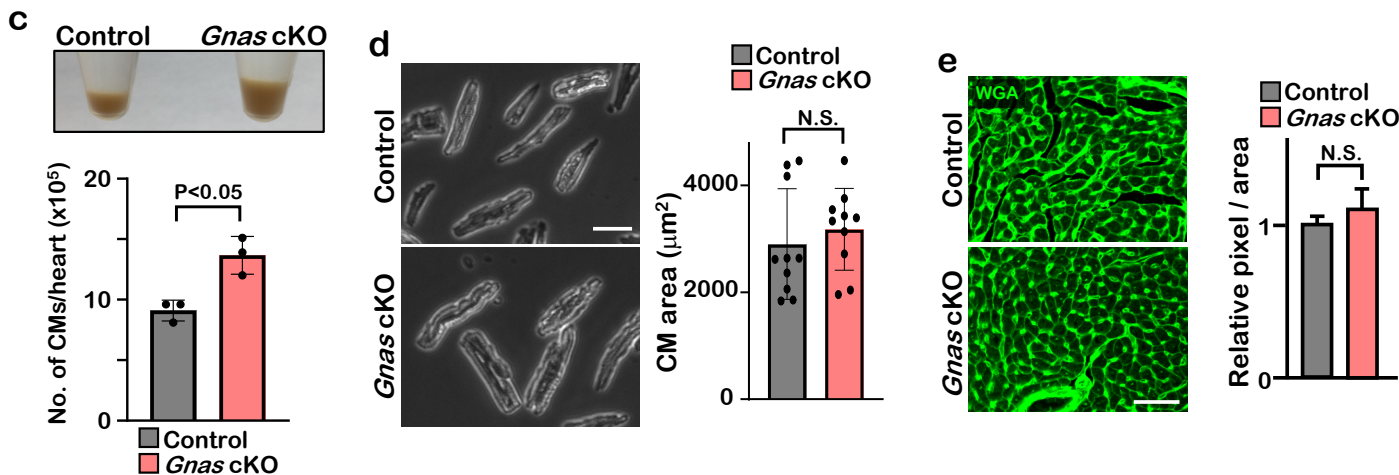

Supplement: supp [file elife_poa_e74576_Figure_3_figure_supplement_1.pdf › elife_poa_e74576_Figure_3_figure_supplement_1.pdf]
